# Supplementary material for: Unravelling the Genome-Wide Contributions of Specific 2-Alkyl-4-Quinolones and PqsE to Quorum Sensing in Pseudomonas aeruginosa
Source: PubMed Central journal article supplement (PMC5112799; doi:10.1371/journal.ppat.1006029), 2016-11-16
Supplement: ppat.1006029.s001.pdf [file ppat.1006029.s001.pdf]

**Table S1. Genes whose transcription is controlled by HHQ, PQS and/or PqsE**

| PA number <sup>a</sup> | Gene name <sup>a</sup> | HHQ <sup>b</sup> | PQS <sup>c</sup> | PqsE <sup>d</sup> | Product name <sup>a</sup>                    |
|------------------------|------------------------|------------------|------------------|-------------------|----------------------------------------------|
| PA0051                 | <i>phzH</i>            |                  |                  | 3.2               | Potential phenazine-modifying enzyme         |
| PA0083                 | <i>tssB1</i>           |                  |                  | -5.1              | TssB1                                        |
| PA0084                 | <i>tssC1</i>           |                  |                  | -3.5              | TssC1                                        |
| <u>PA0129</u>          | <i>bauD</i>            |                  | -5.5             |                   | Amino acid permease                          |
| <u>PA0130</u>          | <i>bauC</i>            |                  | -5.5             |                   | 3-oxopropanoate dehydrogenase                |
| <u>PA0131</u>          | <i>bauB</i>            |                  | -7.5             |                   | BauB                                         |
| <u>PA0132</u>          | <i>bauA</i>            |                  | -6.9             |                   | Beta-alanine:pyruvate transaminase           |
| PA0187 <sup>‡</sup>    |                        |                  |                  | 6.0               | Hypothetical protein                         |
| PA0243 <sup>‡</sup>    |                        |                  |                  | 3.2               | Probable transcriptional regulator           |
| <u>PA0263</u>          | <i>hcpC</i>            |                  | -4.3             |                   | Secreted protein Hcp                         |
| PA0269 <sup>‡</sup>    |                        |                  |                  | 3.3               | Conserved hypothetical protein               |
| PA0270 <sup>‡</sup>    |                        |                  |                  | 2.8               | Hypothetical protein                         |
| PA0271 <sup>‡</sup>    |                        |                  |                  | 3.4               | Hypothetical protein                         |
| PA0298                 | <i>spuB</i>            |                  |                  | -2.8              | Glutamylpolyamine synthetase                 |
| PA0299                 | <i>spuC</i>            |                  |                  | -2.6              | Polyamine:pyruvate transaminase              |
| PA0303                 | <i>spuG</i>            |                  |                  | -2.8              | Polyamine transport protein PotH             |
| PA0328                 | <i>aaaA</i>            |                  |                  | -3.7              | arginine-specific autotransporter, AaaA      |
| <u>PA0423</u>          | <i>pasP</i>            |                  | 2.5              |                   | PasP                                         |
| PA0431                 |                        |                  |                  | 2.7               | Hypothetical protein                         |
| PA0432                 | <i>sahH</i>            |                  |                  | 2.9               | S-adenosyl-L-homocysteine hydrolase          |
| <b>PA0471</b>          | <b><i>fiuR</i></b>     |                  | 2.7              |                   | FiuR                                         |
| <b>PA0472</b>          | <b><i>fiuI</i></b>     |                  | 2.5              |                   | FiuI                                         |
| PA0480 <sup>‡</sup>    |                        |                  |                  | 2.7               | Probable hydrolase                           |
| <u>PA0509</u>          | <i>nirN</i>            |                  | -16.0            | -16.0             | NirN                                         |
| <u>PA0510</u>          | <i>nirE</i>            |                  | -18.8            | -13.1             | NirE                                         |
| <u>PA0511</u>          | <i>nirJ</i>            |                  | -50.3            | -22.1             | Heme <i>d1</i> biosynthesis protein NirJ     |
| <u>PA0512</u>          | <i>nirH</i>            |                  | -22.4            | -14.4             | NirH                                         |
| <u>PA0513</u>          | <i>nirG</i>            |                  | -17.2            | -13.5             | NirG                                         |
| <u>PA0514</u>          | <i>nirL</i>            |                  | -27.2            | -16.1             | Heme <i>d1</i> biosynthesis protein NirL     |
| <u>PA0515</u>          | <i>nirD</i>            |                  | -75.3            | -26.8             | Probable transcriptional regulator           |
| <u>PA0516</u>          | <i>nirF</i>            |                  | -27.3            | -12.8             | Heme <i>d1</i> biosynthesis protein NirF     |
| <u>PA0517</u>          | <i>nirC</i>            |                  | -87.7            | -21.5             | Probable <i>c</i> -type cytochrome precursor |
| <u>PA0518</u>          | <i>nirM</i>            |                  | -109.9           | -28.6             | Cytochrome <i>c551</i> precursor             |
| <u>PA0519</u>          | <i>nirS</i>            |                  | -101.2           | -41.9             | Nitrite reductase precursor                  |
| <u>PA0520</u>          | <i>nirQ</i>            |                  | -4.7             | -3.0              | Regulatory protein NirQ                      |
| <u>PA0521</u>          | <i>nirO</i>            |                  | -3.6             | -3.2              | Probable cytochrome <i>c</i> oxidase subunit |
| <u>PA0523</u>          | <i>norC</i>            |                  | -32.4            | -25.6             | Nitric-oxide reductase subunit C             |
| <u>PA0524</u>          | <i>norB</i>            |                  | -41.0            | -34.3             | Nitric-oxide reductase subunit B             |
| <u>PA0525</u>          | <i>norD</i>            |                  | -7.2             | -7.4              | Probable denitrification protein NorD        |
| <u>PA0526</u>          |                        |                  | -20.1            | -12.4             | Hypothetical protein                         |
| PA0546                 | <i>metK</i>            |                  |                  | 3.0               | Methionine adenosyltransferase               |
| PA0746                 |                        |                  |                  | -2.6              | Probable acyl-CoA dehydrogenase              |

| PA number <sup>a</sup>            | Gene name <sup>a</sup> | HHQ <sup>b</sup> | PQS <sup>c</sup> | PqsE <sup>d</sup> | Product name <sup>a</sup>                          |
|-----------------------------------|------------------------|------------------|------------------|-------------------|----------------------------------------------------|
| <u>PA0792</u>                     | <i>prpD</i>            |                  | 2.9              |                   | Propionate catabolic protein PrpD                  |
| <u>PA0794</u>                     |                        |                  | -3.7             | -3.2              | Probable aconitate hydratase                       |
| PA0795                            | <i>prpC</i>            |                  |                  | -3.5              | Citrate synthase 2                                 |
| PA0796                            | <i>prpB</i>            |                  |                  | -4.6              | Carboxyphosphoenolpyruvate phosphonmutase          |
| PA0848 <sup>§</sup>               | <i>aphB</i>            |                  |                  | 2.5               | alkyl hydroperoxide reductase, AhpB                |
| PA0852                            | <i>cbpD</i>            |                  |                  | 4.1               | Chitin-binding protein CbpD precursor              |
| <u>PA0918</u>                     |                        |                  | -14.3            |                   | Cytochrome <i>b561</i>                             |
| <b>PA0931</b>                     | <i>pirA</i>            |                  | 2.6              |                   | Ferric enterobactin receptor PirA                  |
| PA0997* <sup>‡</sup> <sup>◊</sup> | <i>pqsB</i>            | 6.7              | 17.5             |                   | PqsB                                               |
| PA0998* <sup>‡</sup> <sup>◊</sup> | <i>pqsC</i>            | 5.5              | 16.1             |                   | PqsC                                               |
| PA0999* <sup>‡</sup> <sup>◊</sup> | <i>pqsD</i>            | 5.8              | 15.7             |                   | 3-oxoacyl-[acyl-carrier-protein] synthase III      |
| PA1000* <sup>‡</sup> <sup>◊</sup> | <i>pqsE</i>            |                  |                  | 22.8              | Quinolone signal response protein                  |
| PA1001* <sup>‡</sup> <sup>◊</sup> | <i>phnA</i>            |                  |                  | 26.2              | Anthranilate synthase component I                  |
| PA1002* <sup>‡</sup> <sup>◊</sup> | <i>phnB</i>            |                  |                  | 22.4              | Anthranilate synthase component II                 |
| PA1070                            | <i>braG</i>            |                  |                  | -3.5              | Branched-chain amino acid transport protein BraG   |
| PA1071                            | <i>braF</i>            |                  |                  | -3.1              | Branched-chain amino acid transport protein BraF   |
| PA1072                            | <i>braE</i>            |                  |                  | -4.0              | Branched-chain amino acid transport protein BraE   |
| PA1073                            | <i>braD</i>            |                  |                  | -5.3              | Branched-chain amino acid transport protein BraD   |
| <b>PA1134</b>                     |                        |                  | 3.3              |                   | Hypothetical protein                               |
| <u>PA1172</u>                     | <i>napC</i>            |                  | -5.7             |                   | Cytochrome <i>c</i> -type protein NapC             |
| <u>PA1173</u>                     | <i>napB</i>            |                  | -8.9             |                   | Cytochrome <i>c</i> -type protein NapB precursor   |
| <u>PA1174</u> <sup>§</sup>        | <i>napA</i>            |                  | -6.5             |                   | Periplasmic nitrate reductase protein NapA         |
| <u>PA1195</u>                     |                        |                  | -3.4             |                   | Hypothetical protein                               |
| PA1212 <sup>‡</sup>               |                        |                  |                  | 2.8               | Probable MFS transporter                           |
| PA1213 <sup>‡</sup>               |                        |                  |                  | 3.7               | Hypothetical protein                               |
| PA1214                            |                        |                  |                  | 3.6               | Hypothetical protein                               |
| PA1215                            |                        |                  |                  | 4.1               | Hypothetical protein                               |
| PA1216*                           |                        |                  |                  | 4.9               | Hypothetical protein                               |
| PA1217                            |                        |                  |                  | 5.8               | Probable 2-isopropylmalate synthase                |
| PA1218 <sup>‡</sup>               |                        |                  |                  | 5.5               | Hypothetical protein                               |
| <b>PA1245</b> <sup>§‡</sup>       | <i>aprX</i>            |                  | 3.9              |                   | AprX                                               |
| <b>PA1300</b>                     |                        |                  | 11.1             |                   | Probable sigma-70 factor, ECF subfamily            |
| <b>PA1301</b> <sup>‡</sup>        |                        |                  | 6.1              |                   | Probable transmembrane sensor                      |
| <b>PA1318</b> <sup>‡</sup>        | <i>cyoB</i>            |                  | 2.9              |                   | Cytochrome <i>o</i> -ubiquinol oxidase subunit I   |
| <u>PA1551</u>                     | <i>fixG</i>            |                  | -3.7             |                   | Probable ferredoxin                                |
| <u>PA1562</u>                     | <i>acnA</i>            |                  | -2.6             |                   | Aconitate hydratase 1                              |
| <u>PA1565</u>                     | <i>pauB2</i>           |                  | -9.7             | -3.8              | FAD-dependent oxidoreductase                       |
| <u>PA1583</u>                     | <i>sdhA</i>            |                  | -2.6             |                   | Succinate dehydrogenase (flavoprotein subunit)     |
| <u>PA1602</u>                     |                        |                  | -2.7             |                   | Probable oxidoreductase                            |
| <u>PA1659</u>                     | <i>hsiF2</i>           |                  | -2.5             |                   | HsiF2                                              |
| <u>PA1706</u>                     | <i>pcrV</i>            |                  | 2.7              |                   | Type III secretion protein PcrV                    |
| <u>PA1707</u>                     | <i>pcrH</i>            |                  | 3.1              |                   | Regulatory protein PcrH                            |
| <u>PA1708</u>                     | <i>popB</i>            |                  | 5.6              |                   | Translocator protein PopB                          |
| <u>PA1709</u>                     | <i>popD</i>            |                  | 3.0              |                   | Translocator outer membrane protein PopD precursor |

| <b>PA number</b> <sup>a</sup>     | <b>Gene name</b> <sup>a</sup> | <b>HHQ</b> <sup>b</sup> | <b>PQS</b> <sup>c</sup> | <b>PqsE</b> <sup>d</sup> | <b>Product name</b> <sup>a</sup>                              |
|-----------------------------------|-------------------------------|-------------------------|-------------------------|--------------------------|---------------------------------------------------------------|
| <u>PA1710</u>                     | <i>exsC</i>                   |                         | 3.5                     |                          | ExsC exoenzyme S synthesis protein C precursor                |
| <u>PA1711</u>                     | <i>exsE</i>                   |                         | 3.1                     |                          | ExsE                                                          |
| <u>PA1712</u>                     | <i>exsB</i>                   |                         | 2.6                     |                          | Exoenzyme S synthesis protein B                               |
| <u>PA1718</u>                     | <i>pscE</i>                   |                         | 4.3                     |                          | Type III export protein PscE                                  |
| PA1869                            |                               |                         |                         | 2.8                      | Probable acyl carrier protein                                 |
| PA1888                            |                               |                         |                         | 2.8                      | Hypothetical protein                                          |
| <u>PA1897</u>                     |                               |                         | -3.1                    |                          | Hypothetical protein                                          |
| PA1901 <sup>l</sup>               | <i>phzC2</i>                  |                         |                         | 5.5                      | Phenazine biosynthesis protein PhzC                           |
| PA1902 <sup>§</sup>               | <i>phzD2</i>                  |                         |                         | 7.5                      | Phenazine biosynthesis protein PhzD                           |
| PA1903 <sup>l</sup>               | <i>phzE2</i>                  |                         |                         | 8.8                      | Phenazine biosynthesis protein PhzE                           |
| PA1904                            | <i>phzF2</i>                  |                         |                         | 10.3                     | Probable phenazine biosynthesis protein                       |
| PA1905                            | <i>phzG2</i>                  |                         |                         | 9.7                      | Probable pyridoxamine 5'-phosphate oxidase                    |
| <u>PA1912</u>                     | <i>femI</i>                   |                         | 3.6                     |                          | ECF sigma factor, FemI                                        |
| PA1946                            | <i>rbsB</i>                   |                         |                         | -2.6                     | Binding protein component precursor of ABC ribose transporter |
| PA2014                            | <i>liuB</i>                   |                         |                         | -2.6                     | Methylcrotonyl-CoA carboxylase, beta-subunit                  |
| PA2030                            |                               |                         |                         | 3.7                      | Hypothetical protein                                          |
| PA2031*                           |                               |                         |                         | 3.7                      | Hypothetical protein                                          |
| <b>PA2033</b> <sup>l</sup>        |                               |                         | 17.6                    |                          | Hypothetical protein                                          |
| <b>PA2034</b>                     |                               |                         | 5.5                     |                          | Hypothetical protein                                          |
| PA2041                            |                               |                         |                         | -4.7                     | Amino acid permease                                           |
| PA2066 <sup>‡</sup>               |                               |                         |                         | 3.0                      | Hypothetical protein                                          |
| PA2068 <sup>l</sup>               |                               |                         |                         | 2.7                      | Probable MFS transporter                                      |
| PA2069* <sup>l</sup>              |                               |                         |                         | 3.9                      | Probable carbamoyl transferase                                |
| PA2193*                           | <i>hcnA</i>                   |                         |                         | 3.6                      | Hydrogen cyanide synthase HcnA                                |
| PA2194*                           | <i>hcnB</i>                   |                         |                         | 3.1                      | Hydrogen cyanide synthase HcnB                                |
| PA2195*                           | <i>hcnC</i>                   |                         |                         | 3.0                      | Hydrogen cyanide synthase HcnC                                |
| <u>PA2264</u>                     |                               |                         | -3.4                    |                          | Conserved hypothetical protein                                |
| <u>PA2265</u>                     |                               |                         | -3.7                    |                          | Gluconate dehydrogenase                                       |
| PA2274* <sup>l</sup>              |                               |                         |                         | 5.4                      | Hypothetical protein                                          |
| PA2300* <sup>l</sup> <sup>o</sup> | <i>chiC</i>                   |                         |                         | 18.7                     | Chitinase                                                     |
| <b>PA2383</b>                     |                               |                         | 4.5                     |                          | Probable transcriptional regulator                            |
| <b>PA2384</b> <sup>§</sup>        |                               |                         | 42.2                    |                          | Hypothetical protein                                          |
| <b>PA2385</b>                     | <i>pvdQ</i>                   |                         | 29.1                    |                          | 3-oxo-C <sub>12</sub> -homoserine lactone acylase PvdQ        |
| <b>PA2386</b>                     | <i>pvdA</i>                   |                         | 113.8                   |                          | L-ornithine N5-oxygenase                                      |
| <b>PA2389</b>                     | <i>pvdR</i>                   |                         | 7.3                     |                          | PvdR                                                          |
| <b>PA2390</b>                     | <i>pvdT</i>                   |                         | 4.1                     |                          | PvdT                                                          |
| <b>PA2391</b>                     | <i>opmQ</i>                   |                         | 3.3                     |                          | Probable outer membrane protein precursor                     |
| <b>PA2392</b>                     | <i>pvdP</i>                   |                         | 7.9                     |                          | PvdP                                                          |
| <b>PA2393</b>                     |                               |                         | 55.0                    |                          | Probable dipeptidase precursor                                |
| <b>PA2394</b>                     | <i>pvdN</i>                   |                         | 45.6                    |                          | PvdN                                                          |
| <b>PA2395</b>                     | <i>pvdO</i>                   |                         | 27.3                    |                          | PvdO                                                          |
| <b>PA2396</b>                     | <i>pvdF</i>                   |                         | 49.0                    |                          | Pyoverdine synthetase F                                       |
| <b>PA2397</b>                     | <i>pvdE</i>                   |                         | 48.2                    |                          | Pyoverdine biosynthesis protein PvdE                          |
| <b>PA2398</b>                     | <i>fpvA</i>                   |                         | 16.4                    |                          | Ferripyoverdine receptor                                      |

| PA number <sup>a</sup> | Gene name <sup>a</sup> | HHQ <sup>b</sup> | PQS <sup>c</sup> | PqsE <sup>d</sup> | Product name <sup>a</sup>                                   |
|------------------------|------------------------|------------------|------------------|-------------------|-------------------------------------------------------------|
| PA2399                 | <i>pvdD</i>            |                  | 18.2             |                   | Pyoverdine synthetase D                                     |
| PA2400                 | <i>pvdJ</i>            |                  | 21.9             |                   | PvdJ                                                        |
| PA2402                 |                        |                  | 23.1             |                   | Probable non-ribosomal peptide synthetase                   |
| PA2403                 |                        |                  | 4.7              |                   | Hypothetical protein                                        |
| PA2404                 |                        |                  | 3.6              |                   | Hypothetical protein                                        |
| PA2405 <sup>§</sup>    |                        |                  | 3.9              |                   | Hypothetical protein                                        |
| PA2406                 |                        |                  | 3.4              |                   | Hypothetical protein                                        |
| PA2407                 |                        |                  | 4.6              |                   | Probable adhesion protein                                   |
| PA2408                 |                        |                  | 3.7              |                   | Probable ATP-binding component of ABC transporter           |
| PA2409                 |                        |                  | 3.5              |                   | Probable permease of ABC transporter                        |
| PA2410                 |                        |                  | 3.0              |                   | Hypothetical protein                                        |
| PA2411                 |                        |                  | 30.2             |                   | Probable thioesterase                                       |
| PA2412 <sup>§l</sup>   |                        |                  | 70.7             |                   | Conserved hypothetical protein                              |
| PA2413 <sup>l</sup>    | <i>pvdH</i>            |                  | 43.1             |                   | L-2,4-diaminobutyrate:2-ketoglutarate 4-aminotransferase    |
| PA2424                 | <i>pvdL</i>            |                  | 26.2             |                   | PvdL                                                        |
| PA2425                 | <i>pvdG</i>            |                  | 11.6             |                   | PvdG                                                        |
| PA2426                 | <i>pvdS</i>            |                  | 43.9             |                   | Sigma factor PvdS                                           |
| PA2427                 |                        |                  | 21.3             |                   | Hypothetical protein                                        |
| PA2444                 | <i>glyA2</i>           |                  |                  | -3.9              | Serine hydroxymethyltransferase                             |
| PA2448 <sup>‡</sup>    |                        |                  |                  | 3.7               | Hypothetical protein                                        |
| PA2451                 |                        |                  | 5.1              |                   | Hypothetical protein                                        |
| PA2452                 |                        |                  | 48.2             |                   | Hypothetical protein                                        |
| <u>PA2481</u>          |                        |                  | -2.9             |                   | Hypothetical protein                                        |
| <u>PA2482</u>          |                        |                  | -2.7             |                   | Probable cytochrome <i>c</i>                                |
| PA2509 <sup>l‡</sup>   | <i>catB</i>            |                  |                  | 4.3               | Muconate cycloisomerase I                                   |
| PA2511 <sup>‡</sup>    | <i>antR</i>            |                  |                  | 3.2               | AntR                                                        |
| PA2531                 |                        |                  | 3.2              |                   | Probable aminotransferase                                   |
| PA2554                 |                        |                  |                  | -2.7              | Probable short-chain dehydrogenase                          |
| PA2555                 |                        |                  |                  | -2.8              | Probable AMP-binding enzyme                                 |
| PA2557                 |                        |                  |                  | -3.3              | Probable AMP-binding enzyme                                 |
| PA2564                 | <i>tam</i>             |                  |                  | 4.6               | Hypothetical protein                                        |
| PA2565                 |                        |                  |                  | 3.5               | Hypothetical protein                                        |
| PA2570 <sup>*l‡</sup>  | <i>lecA</i>            |                  |                  | 26.3              | LecA lectin                                                 |
| PA2588                 |                        |                  |                  | 2.7               | Probable transcriptional regulator                          |
| PA2682                 |                        |                  |                  | 3.0               | Conserved hypothetical protein                              |
| <u>PA2765</u>          |                        |                  | -2.9             |                   | Hypothetical protein                                        |
| PA2862                 | <i>lipA</i>            |                  |                  | -8.7              | Lactonizing lipase precursor                                |
| <u>PA2953</u>          |                        |                  | -2.9             |                   | Electron transfer flavoprotein-ubiquinone oxidoreductase    |
| PA3032 <sup>§</sup>    | <i>snr1</i>            |                  |                  | 5.4               | Cytochrome <i>c</i> Snr1                                    |
| <u>PA3120</u>          | <i>leuD</i>            |                  | -2.5             |                   | 3-isopropylmalate dehydratase small subunit                 |
| <u>PA3121</u>          | <i>leuC</i>            |                  | -3.6             |                   | 3-isopropylmalate dehydratase large subunit                 |
| PA3190                 | <i>gltB</i>            |                  |                  | -3.3              | Probable binding protein component of ABC sugar transporter |
| PA3192                 | <i>gltR</i>            |                  |                  | -2.6              | Two-component response regulator GltR                       |
| PA3195 <sup>*</sup>    | <i>gapA</i>            |                  |                  | -4.6              | Glyceraldehyde 3-phosphate dehydrogenase                    |

| PA number <sup>a</sup> | Gene name <sup>a</sup> | HHQ <sup>b</sup> | PQS <sup>c</sup> | PqsE <sup>d</sup> | Product name <sup>a</sup>                              |
|------------------------|------------------------|------------------|------------------|-------------------|--------------------------------------------------------|
| PA3300                 | <i>fadD2</i>           |                  |                  | -2.5              | Long-chain-fatty-acid-CoA ligase                       |
| PA3361* <sup>o</sup>   | <i>lecB</i>            |                  |                  | 8.5               | Fucose-binding lectin LecB                             |
| PA3369*                |                        |                  |                  | 3.1               | Hypothetical protein                                   |
| <u>PA3391</u>          | <i>nosR</i>            |                  | -4.6             | -4.1              | Regulatory protein NosR                                |
| <u>PA3392*</u>         | <i>nosZ</i>            |                  | -72.7            | -58.8             | Nitrous-oxide reductase precursor                      |
| <u>PA3393</u>          | <i>nosD</i>            |                  | -8.8             | -9.0              | NosD protein                                           |
| <u>PA3394</u>          | <i>nosF</i>            |                  | -6.3             | -5.8              | NosF protein                                           |
| <u>PA3395</u>          | <i>nosY</i>            |                  | -3.9             | -3.2              | NosY protein                                           |
| <u>PA3396</u>          | <i>nosL</i>            |                  | -3.4             | -2.7              | NosL protein                                           |
| <b>PA3407</b>          | <b><i>hasAp</i></b>    |                  | 76.6             |                   | Heme acquisition protein HasAp                         |
| <b>PA3408</b>          | <b><i>hasR</i></b>     |                  | 6.4              |                   | Heme uptake outer membrane receptor HasR precursor     |
| <b>PA3410</b>          | <b><i>hasI</i></b>     |                  | 7.6              |                   | HasI                                                   |
| <u>PA3441</u>          | <i>ssuF</i>            |                  | 10.2             |                   | Probable molybdopterin-binding protein                 |
| <u>PA3444</u>          | <i>ssuD</i>            |                  | 4.2              |                   | Conserved hypothetical protein                         |
| <u>PA3452</u>          | <i>mqaA</i>            |                  | 2.6              |                   | Malate:quinone oxidoreductase                          |
| PA3478*                | <i>rhlB</i>            |                  |                  | 3.6               | Rhamnosyltransferase chain B                           |
| PA3479                 | <i>rhlA</i>            |                  |                  | 3.6               | Rhamnosyltransferase chain A                           |
| PA3484                 | <i>tse3</i>            |                  |                  | -2.6              | Tse3                                                   |
| PA3520* <sup>s</sup>   |                        |                  |                  | 4.0               | Hypothetical protein                                   |
| <u>PA3524</u>          | <i>gloA1</i>           |                  | -2.7             |                   | Lactoylglutathione lyase                               |
| <b>PA3530</b>          | <b><i>bfd</i></b>      |                  | 18.6             |                   | Bacterioferritin-associated ferredoxin Bfd             |
| PA3568                 | <i>ymmS</i>            |                  |                  | -8.9              | Probable acetyl-CoA synthetase                         |
| PA3569                 | <i>mmsB</i>            |                  |                  | -5.3              | 3-hydroxyisobutyrate dehydrogenase                     |
| PA3570                 | <i>mmsA</i>            |                  |                  | -3.9              | Methylmalonate-semialdehyde dehydrogenase              |
| <u>PA3600</u>          | <i>rpl36</i>           |                  | 3.0              |                   | Conserved hypothetical protein                         |
| <u>PA3601</u>          | <i>ykgM</i>            |                  | 2.7              |                   | Conserved hypothetical protein                         |
| <u>PA3602</u>          | <i>yerD</i>            |                  | -6.4             |                   | Conserved hypothetical protein                         |
| PA3709                 |                        |                  |                  | -6.4              | Probable MFS transporter                               |
| PA3710                 |                        |                  |                  | -5.0              | Probable GMC-type oxidoreductase                       |
| PA3734                 |                        |                  |                  | 4.8               | Hypothetical protein                                   |
| <u>PA3784</u>          |                        |                  | -6.0             |                   | Hypothetical protein                                   |
| <u>PA3785</u>          |                        |                  | -7.0             |                   | Conserved hypothetical protein                         |
| <u>PA3790</u>          | <i>oprC</i>            |                  | -3.7             |                   | Putative copper transport outer membrane porin OprC    |
| <u>PA3841</u>          | <i>exoS</i>            |                  | 2.6              |                   | Exoenzyme S                                            |
| <u>PA3842</u>          | <i>spcS</i>            |                  | 3.9              |                   | Specific <i>Pseudomonas</i> chaperone for ExoS, SpcS   |
| <u>PA3866</u>          |                        |                  | 2.6              |                   | Pyocin protein                                         |
| <u>PA3870</u>          | <i>moaA1</i>           |                  | -2.7             |                   | Molybdopterin biosynthetic protein A1                  |
| <u>PA3872</u>          | <i>narI</i>            |                  | -7.0             | -5.0              | Respiratory nitrate reductase gamma chain              |
| <u>PA3873</u>          | <i>narJ</i>            |                  | -3.6             | -3.1              | Respiratory nitrate reductase delta chain              |
| <u>PA3874</u>          | <i>narH</i>            |                  | -6.5             | -3.8              | Respiratory nitrate reductase beta chain               |
| <b>PA3899</b>          | <b><i>fecI</i></b>     |                  | 3.4              |                   | FecI                                                   |
| <u>PA3938</u>          | <i>tauA</i>            |                  | 2.7              |                   | Probable periplasmic taurine-binding protein precursor |
| PA4023                 | <i>eutP</i>            |                  |                  | -4.5              | Probable transport protein                             |
| PA4024                 | <i>eutB</i>            |                  |                  | -2.8              | Ethanolamine ammonia-lyase large subunit               |

| PA number <sup>a</sup>         | Gene name <sup>a</sup> | HHQ <sup>b</sup> | PQS <sup>c</sup> | PqsE <sup>d</sup> | Product name <sup>a</sup>                                 |
|--------------------------------|------------------------|------------------|------------------|-------------------|-----------------------------------------------------------|
| PA4078*                        |                        |                  |                  | 12.1              | Probable nonribosomal peptide synthetase                  |
| <u>PA4131</u> §                |                        |                  | -5.8             |                   | Probable iron-sulfur protein                              |
| <u>PA4132</u>                  |                        |                  | -3.1             |                   | Conserved hypothetical protein                            |
| <u>PA4133</u>                  | <i>ccoN</i>            |                  | -5.2             |                   | Cytochrome c oxidase subunit (cbb3-type)                  |
| <u>PA4134</u> ‡                |                        |                  | -6.1             |                   | Hypothetical protein                                      |
| <u>PA4140</u> ‡                |                        |                  | 5.3              |                   | Hypothetical protein                                      |
| <u>PA4141</u> *§‡              |                        |                  | 4.4              | 5.2               | Hypothetical protein                                      |
| <u>PA4142</u> ‡                |                        |                  | 4.3              | 4.8               | Probable secretion protein                                |
| <b>PA4168</b>                  | <i>fpvB</i>            |                  | 4.0              |                   | Second ferric pyoverdine receptor FpvB                    |
| <b>PA4175</b>                  | <i>prpL</i>            |                  | 3.7              |                   | PrpL, protease IV                                         |
| PA4205* <sup>10</sup>          | <i>mexG</i>            |                  |                  | 25.0              | Hypothetical protein                                      |
| PA4206* <sup>10</sup>          | <i>mexH</i>            |                  |                  | 16.4              | Probable RND efflux membrane fusion protein precursor     |
| PA4207* <sup>10</sup>          | <i>mexI</i>            |                  |                  | 18.5              | Probable RND efflux transporter                           |
| PA4208* <sup>10</sup>          | <i>opmD</i>            |                  |                  | 11.6              | Probable outer membrane protein precursor                 |
| PA4209* <sup>10</sup>          | <i>phzM</i>            |                  |                  | 4.1               | Probable phenazine-specific methyltransferase             |
| PA4210 <sup>0</sup>            | <i>phzA</i>            |                  |                  | 10.2              | Probable phenazine biosynthesis protein                   |
| PA4211* <sup>0</sup>           | <i>phzB</i>            |                  |                  | 5.6               | Probable phenazine biosynthesis protein                   |
| PA4217* <sup>0</sup> §         | <i>phzS</i>            |                  |                  | 9.0               | Flavin-containing monooxygenase                           |
| <b>PA4218</b> § <sup>1</sup>   | <i>ampP</i>            |                  | 22.6             |                   | AmpP                                                      |
| <b>PA4219</b>                  | <i>yfpB</i>            |                  | 10.7             |                   | AmpO                                                      |
| <b>PA4220</b> §                | <i>fptB</i>            |                  | 30.3             |                   | Hypothetical protein                                      |
| <b>PA4221</b> § <sup>1</sup> ‡ | <i>fptA</i>            |                  | 23.6             |                   | Fe(III)-pyochelin outer membrane receptor precursor       |
| <b>PA4222</b> § <sup>1</sup> ‡ | <i>pchI</i>            |                  | 13.8             |                   | Probable ATP-binding component of ABC transporter         |
| <b>PA4223</b> §                | <i>pchH</i>            |                  | 13.7             |                   | Probable ATP-binding component of ABC transporter         |
| <b>PA4224</b> §                | <i>pchG</i>            |                  | 40.1             |                   | Pyochelin biosynthetic protein PchG                       |
| <b>PA4225</b> § <sup>1</sup> ‡ | <i>pchF</i>            |                  | 37.0             |                   | Pyochelin synthetase                                      |
| <b>PA4226</b> § <sup>1</sup> ‡ | <i>pchE</i>            |                  | 28.0             |                   | Dihydroaeruginosic acid synthetase                        |
| <b>PA4227</b> ‡                | <i>pchR</i>            |                  | 11.2             |                   | Transcriptional regulator PchR                            |
| <b>PA4228</b> § <sup>1</sup> ‡ | <i>pchD</i>            |                  | 34.1             |                   | Pyochelin biosynthesis protein PchD                       |
| <b>PA4229</b> § <sup>1</sup>   | <i>pchC</i>            |                  | 31.5             |                   | Pyochelin biosynthetic protein PchC                       |
| <b>PA4230</b> § <sup>1</sup>   | <i>pchB</i>            |                  | 47.3             |                   | Salicylate biosynthesis protein PchB                      |
| <b>PA4231</b> § <sup>1</sup> ‡ | <i>pchA</i>            |                  | 44.0             |                   | Salicylate biosynthesis isochorismate synthase            |
| <u>PA4236</u> §                | <i>katA</i>            |                  | -5.5             |                   | Catalase                                                  |
| <u>PA4333</u>                  | <i>fumA</i>            |                  | -3.4             |                   | Probable fumarase                                         |
| <u>PA4366</u>                  | <i>sodB</i>            |                  | -3.8             |                   | Superoxide dismutase                                      |
| <b>PA4370</b>                  | <i>icmP</i>            |                  | 2.6              |                   | Insulin-cleaving metalloproteinase outer membrane protein |
| PA4384                         |                        |                  |                  | 3.0               | Hypothetical protein                                      |
| <u>PA4429</u>                  |                        |                  | -2.9             |                   | Probable cytochrome <i>cI</i> precursor                   |
| <u>PA4430</u>                  |                        |                  | -3.1             |                   | Probable cytochrome <i>b</i>                              |
| <u>PA4431</u>                  |                        |                  | -2.8             |                   | Probable iron-sulfur protein                              |
| <b>PA4467</b>                  |                        |                  | 12.9             |                   | Hypothetical protein                                      |
| <b>PA4468</b> §                | <i>sodA</i>            |                  | 89.4             |                   | Superoxide dismutase                                      |
| <b>PA4469</b> § <sup>1</sup>   | <i>orfX</i>            |                  | 136.5            |                   | OrfX                                                      |
| <b>PA4470</b> § <sup>1</sup>   | <i>fumC1</i>           |                  | 114.7            |                   | Fumarate hydratase                                        |

| PA number <sup>a</sup>      | Gene name <sup>a</sup> | HHQ <sup>b</sup> | PQS <sup>c</sup> | PqsE <sup>d</sup> | Product name <sup>a</sup>                              |
|-----------------------------|------------------------|------------------|------------------|-------------------|--------------------------------------------------------|
| <b>PA4471</b> <sup>§</sup>  | <b><i>fagA</i></b>     |                  | 58.6             |                   | FagA                                                   |
| PA4500                      |                        |                  |                  | -2.6              | Probable binding protein component of ABC transporter  |
| PA4501                      | <i>opdD</i>            |                  |                  | -5.4              | Glycine-glutamate dipeptide porin OpdP                 |
| PA4502                      |                        |                  |                  | -2.8              | Probable binding protein component of ABC transporter  |
| PA4519                      | <i>speC</i>            |                  |                  | 2.7               | Ornithine decarboxylase                                |
| <b>PA4570</b>               |                        |                  | 57.4             |                   | Hypothetical protein                                   |
| <u>PA4587</u> <sup>*§</sup> | <i>ccpR</i>            |                  | -12.3            |                   | Cytochrome <i>c55I</i> peroxidase precursor            |
| PA4613 <sup>§‡</sup>        | <i>katB</i>            |                  |                  | 2.7               | Catalase                                               |
| PA4623                      |                        |                  |                  | 2.5               | Hypothetical protein                                   |
| PA4648                      | <i>cupE1</i>           |                  |                  | 3.0               | Pilin subunit CupE1                                    |
| <b>PA4708</b>               | <b><i>phuT</i></b>     |                  | 4.2              |                   | Heme-transport protein, PhuT                           |
| <b>PA4709</b>               | <b><i>phuS</i></b>     |                  | 4.5              |                   | PhuS                                                   |
| <b>PA4710</b>               | <b><i>phuR</i></b>     |                  | 9.2              |                   | Heme/Haemoglobin uptake outer membrane receptor PhuR   |
| PA4774                      |                        |                  |                  | -2.5              | Hypothetical protein                                   |
| <u>PA4810</u>               | <i>fdnI</i>            |                  | -3.0             |                   | Nitrate-inducible formate dehydrogenase, gamma subunit |
| <u>PA4811</u> <sup>§</sup>  | <i>fdnH</i>            |                  | -4.5             |                   | Nitrate-inducible formate dehydrogenase, beta subunit  |
| <u>PA4812</u> <sup>§</sup>  | <i>fdnG</i>            |                  | -5.3             |                   | Formate dehydrogenase-O, major subunit                 |
| <u>PA4880</u> <sup>§</sup>  |                        |                  | -10.4            |                   | Probable bacterioferritin                              |
| <b>PA4896</b>               |                        |                  | 3.5              |                   | Probable sigma-70 factor, ECF subfamily                |
| PA5058                      | <i>phaC2</i>           |                  |                  | 2.5               | Poly(3-hydroxyalkanoic acid) synthase 2                |
| PA5082                      | <i>dguC</i>            |                  |                  | -13.2             | DguC                                                   |
| PA5098                      | <i>hutH</i>            |                  |                  | -3.5              | Histidine ammonia-lyase                                |
| PA5100                      | <i>hutU</i>            |                  |                  | -3.2              | Urocanase                                              |
| PA5153                      |                        |                  |                  | -2.6              | Amino acid ABC transporter periplasmic binding protein |
| PA5154                      |                        |                  |                  | -4.5              | Probable permease of ABC transporter                   |
| PA5167                      | <i>dctP</i>            |                  |                  | -3.4              | DctP                                                   |
| PA5168                      | <i>dctQ</i>            |                  |                  | -5.6              | DctQ                                                   |
| PA5169                      | <i>dctM</i>            |                  |                  | -7.0              | DctM                                                   |
| <u>PA5300</u>               | <i>cycB</i>            |                  | -3.4             |                   | Cytochrome <i>c5</i>                                   |
| <u>PA5355</u>               | <i>glcD</i>            |                  | -3.5             |                   | Glycolate oxidase subunit GlcD                         |
| <u>PA5380</u>               | <i>gbdR</i>            |                  | -2.6             |                   | GbdR                                                   |
| <u>PA5396</u>               |                        |                  | -4.3             |                   | Hypothetical protein                                   |
| <u>PA5397</u>               |                        |                  | -4.6             |                   | Hypothetical protein                                   |
| <u>PA5410</u>               | <i>gbcA</i>            |                  | -5.7             |                   | GbcA                                                   |
| PA5460 <sup>§</sup>         |                        |                  |                  | 3.7               | Hypothetical protein                                   |

<sup>a</sup> PA number, gene name and product name are from the *Pseudomonas* Genome Database [13]. Genes previously reported controlled by iron-starvation are in bold characters [40,41]; genes controlled by PQS via a PqsR-independent and iron starvation-independent signalling pathway(s) are underlined. \*, genes whose transcription was altered in the  $\Delta pqsR$  mutant with respect to the wild type strain [10]; §, genes whose transcription was altered upon exogenous PQS provision [28]; ¶, genes whose transcription was altered in the  $\Delta pqsA$  mutant with respect to the wild type strain [11]; ‡, genes whose transcription was altered upon PqsE overexpression [11]; ◇, genes whose transcription was altered in the  $\Delta pqsH$  mutant with respect to the wild type strain [23]. RND, Resistance-Nodulation-Cell division; MFS, major facilitator superfamily.

- <sup>b</sup> Fold change in gene expression in *P. aeruginosa* PAO1  $\Delta$ 4AQ grown in LB supplemented with 40  $\mu$ M HHQ with respect to the same strain grown in LB.
- <sup>c</sup> Fold change in gene expression in *P. aeruginosa* PAO1  $\Delta$ 4AQ grown in LB supplemented with 40  $\mu$ M PQS with respect to the same strain grown in LB.
- <sup>d</sup> Fold change in gene expression in *P. aeruginosa* PAO1  $\Delta$ 4AQ grown in LB supplemented with 1 mM IPTG (to induce PqsE expression) with respect to the same strain grown in LB.
