# Supplementary material for: Unravelling the Genome-Wide Contributions of Specific 2-Alkyl-4-Quinolones and PqsE to Quorum Sensing in Pseudomonas aeruginosa
Source: PubMed Central journal article supplement (PMC5112799; doi:10.1371/journal.ppat.1006029), 2016-11-16
Supplement: ppat.1006029.s002.pdf [file ppat.1006029.s002.pdf]

**Table S2. Bacterial strains and plasmids**

| Strains/Plasmids            | Relevant characteristics and plasmids construction                                                                                                                                                          | Reference/Source |
|-----------------------------|-------------------------------------------------------------------------------------------------------------------------------------------------------------------------------------------------------------|------------------|
| <b><i>E. coli</i></b>       |                                                                                                                                                                                                             |                  |
| DH5 $\alpha$                | Cloning strain.                                                                                                                                                                                             | [55]             |
| S17.1 $\lambda$ <i>pir</i>  | Conjugative strain for suicide plasmids.                                                                                                                                                                    | [56]             |
| H1717                       | Mutant strain carrying the <i>PfhuF::lacZ</i> transcriptional fusion that does not produce the siderophore enterochelin. Used for the Fur titration assay (FurTA).                                          | [51]             |
| <b><i>P. aeruginosa</i></b> |                                                                                                                                                                                                             |                  |
| PAO1                        | Nottingham collection wild type strain.                                                                                                                                                                     |                  |
| $\Delta pqsA \Delta pqsH$   | <i>pqsA</i> and <i>pqsH</i> double mutant of strain PAO1.                                                                                                                                                   | [27]             |
| $\Delta pqsA \Delta pqsE$   | <i>pqsA</i> and <i>pqsE</i> double mutant of strain PAO1.                                                                                                                                                   | [11]             |
| $\Delta pqsR$               | <i>pqsR</i> mutant of strain PAO1.                                                                                                                                                                          | This study       |
| $\Delta 4AQ$                | Quadruple mutant of PAO1 carrying in frame clear deletions of the <i>pqsA</i> , <i>pqsH</i> , and <i>pqsL</i> genes, in which <i>pqsE</i> is under the control of an IPTG-inducible promoter.               | This study       |
| $\Delta 5AQ$                | Quintuple mutant of PAO1 carrying in frame clear deletions of the <i>pqsA</i> , <i>pqsH</i> , <i>pqsL</i> , and <i>pqsR</i> genes, in which <i>pqsE</i> is under the control of an IPTG-inducible promoter. | This study       |
| $\Delta pvdS$               | <i>pvdS</i> mutant of strain PAO1.                                                                                                                                                                          | This study       |
| $\Delta 4AQ \Delta pvdS$    | $\Delta 4AQ$ strain carrying a deletion of the <i>pvdS</i> gene.                                                                                                                                            | This study       |
| $\Delta 5AQ \Delta pvdS$    | $\Delta 5AQ$ strain carrying a deletion of the <i>pvdS</i> gene.                                                                                                                                            | This study       |
| $\Delta pqsAHLE$            | Quadruple mutant of PAO1 carrying in frame clear deletions of the <i>pqsA</i> , <i>pqsH</i> , <i>pqsL</i> and <i>pqsE</i> genes.                                                                            | This study       |
| <b>Plasmids</b>             |                                                                                                                                                                                                             |                  |
| pBluescript II KS(+)        | Cloning vector; ColE1 replicon; Ap <sup>R</sup> .                                                                                                                                                           | Stratagene       |
| pDM4                        | Suicide vector; <i>sacBR</i> ; <i>oriR6K</i> ; Cm <sup>R</sup> .                                                                                                                                            | [57]             |
| pME6032                     | pVS1-p15A shuttle expression (IPTG-inducible) vector, Tc <sup>R</sup> .                                                                                                                                     | [58]             |
| miniCTX- <i>lux</i>         | Promoter-probe vector containing the <i>luxCDABE</i> operon; Tc <sup>R</sup> .                                                                                                                              | [59]             |
| pEX $\Delta pvdS$           | pEX18 derivative used to introduce the <i>pvdS</i> mutation in PAO1 wild type, $\Delta 4AQ$ and $\Delta 5AQ$ .                                                                                              | [53]             |
| pDM4 <i>pqsE</i> ind        | pDM4 derivative for the generation of the <i>pqsE</i> -inducible strain $\Delta 4AQ$ .                                                                                                                      | [11]             |

| Strains/Plasmids           | Relevant characteristics and plasmids construction                                                                                                                                                                                                                                                                                                                                                                      | Reference/Source |
|----------------------------|-------------------------------------------------------------------------------------------------------------------------------------------------------------------------------------------------------------------------------------------------------------------------------------------------------------------------------------------------------------------------------------------------------------------------|------------------|
| pDM4 $\Delta$ <i>pqsE</i>  | pDM4 derivative for the generation of the PAO1 $\Delta$ <i>pqsAHLE</i> mutant strain.                                                                                                                                                                                                                                                                                                                                   | [11]             |
| pDM4 $\Delta$ <i>pqsR</i>  | pDM4 derivative used to introduce the <i>pqsR</i> mutation in PAO1 wild type and in the $\Delta$ 5AQ strain.                                                                                                                                                                                                                                                                                                            | [24]             |
| miniCTX- <i>PpqsA::lux</i> | miniCTX- <i>lux</i> derivative used to insert the <i>PpqsA::lux</i> fusion in the chromosome of different <i>P. aeruginosa</i> strains.                                                                                                                                                                                                                                                                                 | [27]             |
| pUCP18                     | pUC18 derivative containing a stabilising fragment for maintenance in <i>Pseudomonas</i> ; Ap <sup>R</sup> , <i>E. coli</i> / Cb <sup>R</sup> , <i>P. aeruginosa</i> .                                                                                                                                                                                                                                                  | [60]             |
| pUCP <i>pqsE</i>           | pUCP18 derivative for <i>pqsE</i> complementation; Ap <sup>R</sup> .                                                                                                                                                                                                                                                                                                                                                    | [11]             |
| pBS <i>pqsLUP</i>          | The DNA fragment encompassing the upstream region of the <i>pqsL</i> gene originated with primers FW <i>pqsLUP</i> and RV <i>pqsLUP</i> (Table S3) was cloned in pBluescript II KS(+) by XhoI-EcoRI restriction.                                                                                                                                                                                                        | This study       |
| pBS <i>pqsLDOWN</i>        | The DNA fragment encompassing the downstream region of the <i>pqsL</i> gene originated with primers FW <i>pqsLDOWN</i> and RV <i>pqsLDOWN</i> (Table S3) was cloned in pBluescript II KS(+) by EcoRI-XbaI restriction.                                                                                                                                                                                                  | This study       |
| pDM4 $\Delta$ <i>pqsL</i>  | pDM4-derived plasmid used to introduce the <i>pqsL</i> mutation in <i>P. aeruginosa</i> $\Delta$ <i>pqsA</i> $\Delta$ <i>pqsH</i> . It contains the DNA fragments encompassing the upstream region <i>pqsL</i> (extracted by XhoI-EcoRI restriction from pBS <i>pqsLUP</i> ) and the downstream region of <i>pqsL</i> (extracted by EcoRI-XbaI restriction from pBS <i>pqsLDOWN</i> ), and cloned in pDM4 by XhoI-XbaI. | This study       |
| miniCTX- <i>PpqsH::lux</i> | miniCTX- <i>lux</i> derivative used to insert the <i>PpqsH::lux</i> fusion in the chromosome of different <i>P. aeruginosa</i> strains. Obtained by cloning in miniCTX- <i>lux</i> with restriction enzymes XhoI-PstI a DNA region encompassing the <i>PpqsH</i> promoter amplified with primers FW <i>PpqsH</i> and RV <i>PpqsH</i> (Table S3).                                                                        | This study       |
| miniCTX- <i>PpqsL::lux</i> | miniCTX- <i>lux</i> derivative used to insert the <i>PpqsL::lux</i> fusion in the chromosome of different <i>P. aeruginosa</i> strains. Obtained by cloning in miniCTX- <i>lux</i> with restriction enzymes XhoI-PstI a DNA region encompassing the <i>PpqsL</i> promoter amplified with primers FW <i>PpqsL</i> and RV <i>PpqsL</i> (Table S3).                                                                        | This study       |

| Strains/Plasmids              | Relevant characteristics and plasmids construction                                                                                                                                                                                                                                                                                                         | Reference/Source |
|-------------------------------|------------------------------------------------------------------------------------------------------------------------------------------------------------------------------------------------------------------------------------------------------------------------------------------------------------------------------------------------------------|------------------|
| miniCTX- <i>PpqsR::lux</i>    | miniCTX- <i>lux</i> derivative used to insert the <i>PpqsR::lux</i> fusion in the chromosome of different <i>P. aeruginosa</i> strains. Obtained by cloning in miniCTX- <i>lux</i> with restriction enzymes HindIII-EcoRI a DNA region encompassing the <i>PpqsR</i> promoter amplified with primers FW <i>PpqsR</i> and RV <i>PpqsR</i> (Table S3).       | This study       |
| miniCTX- <i>PpchR::lux</i>    | miniCTX- <i>lux</i> derivative used to test the ability of Fur to bind the <i>PpchR</i> promoter (FurTA; positive control). Obtained by cloning in miniCTX- <i>lux</i> with restriction enzymes XhoI-HindIII a DNA region encompassing the <i>PpchR</i> promoter amplified with primers FW <i>PpchR</i> and RV <i>PpchR</i> (Table S3).                    | This study       |
| miniCTX- <i>PphzA1::lux</i>   | miniCTX- <i>lux</i> derivative used to insert the <i>PphzA1::lux</i> fusion into the chromosome of <i>P. aeruginosa</i> $\Delta pqsAHLE$ . Obtained by cloning in miniCTX- <i>lux</i> with restriction enzymes HindIII-BamHI a DNA region encompassing the <i>PphzA1</i> promoter amplified with primers FW <i>PphzA1</i> and RV <i>PphzA1</i> (Table S3). | This study       |
| miniCTX- <i>PphzA2::lux</i>   | miniCTX- <i>lux</i> derivative used to insert the <i>PphzA2::lux</i> fusion into the chromosome of <i>P. aeruginosa</i> $\Delta pqsAHLE$ . Obtained by cloning in miniCTX- <i>lux</i> with restriction enzymes EcoRI-PstI a DNA region encompassing the <i>PphzA2</i> promoter amplified with primers FW <i>PphzA2</i> and RV <i>PphzA2</i> (Table S3).    | This study       |
| pME- <i>pqsE</i>              | pME6032 derivative for the IPTG-dependent expression on <i>pqsE</i> . Obtained by cloning in pME6032 with restriction enzymes EcoRI-SacI a DNA region encompassing the <i>pqsE</i> gene amplified with primers FW <i>pqsE</i> and RV <i>pqsE</i> (Table S3).                                                                                               | This study       |
| pME- <i>pqsE</i> $\Delta$ 1-6 | pME6032 derivative for the IPTG-dependent expression of a mutated variant of <i>pqsE</i> lacking the first two codons (ATGTTG). Obtained by cloning in pME6032 with restriction enzymes EcoRI-SacI a DNA region encompassing the <i>pqsE</i> gene amplified with primers FW <i>pqsE</i> $\Delta$ 1-6 and RV <i>pqsE</i> $\Delta$ 1-6 (Table S3).           | This study       |

| Strains/Plasmids         | Relevant characteristics and plasmids construction                                                                                                                                                                                                                                                    | Reference/Source |
|--------------------------|-------------------------------------------------------------------------------------------------------------------------------------------------------------------------------------------------------------------------------------------------------------------------------------------------------|------------------|
| pME- <i>pqsE</i> NoFrame | pME6032 derivative for the IPTG-dependent expression of a mutated variant of <i>pqsE</i> out of frame. Obtained by cloning in pME6032 with restriction enzymes EcoRI-SacI a DNA region encompassing the <i>pqsE</i> gene amplified with primers FW <i>pqsE</i> NoFrame and RV <i>pqsE</i> (Table S3). | This study       |

**Additional references for Table S2:**

55. Grant SG, Jessee J, Bloom FR, Hanahan D. Differential plasmid rescue from transgenic mouse DNAs into *Escherichia coli* methylation-restriction mutants. *Proc Natl Acad Sci USA*. 1990;87:4645-9.
56. Simon R, Priefer U, Puhler A. A broad host range mobilization system for *in vivo* genetic-engineering: transposon mutagenesis in Gram-negative bacteria. *Biotechnology*. 1983;1:784-91.
57. Milton DL, O'Toole R, Horstedt P, Wolf-Watz H. Flagellin A is essential for the virulence of *Vibrio anguillarum*. *J Bacteriol*. 1996;178:1310-9.
58. Heeb S, Blumer C, Haas D. Regulatory RNA as mediator in GacA/RsmA-dependent global control of exoproduct formation in *Pseudomonas fluorescens* CHA0. *J Bacteriol*. 2002;184:1046-56.
59. Becher A, Schweizer HP. Integration-proficient *Pseudomonas aeruginosa* vectors for isolation of single-copy chromosomal *lacZ* and *lux* gene fusions. *Biotechniques*. 2000;29:948-50.
60. Schweizer HP. *Escherichia-Pseudomonas* shuttle vectors derived from pUC18/19. *Gene*. 1991;97:109-21.
