# Supplementary material for: Unravelling the Genome-Wide Contributions of Specific 2-Alkyl-4-Quinolones and PqsE to Quorum Sensing in Pseudomonas aeruginosa
Source: PubMed Central journal article supplement (PMC5112799; doi:10.1371/journal.ppat.1006029), 2016-11-16
Supplement: ppat.1006029.s003.pdf [file ppat.1006029.s003.pdf]

**Table S3. Oligonucleotides**

| Name          | Sequence (5'-3') <sup>a</sup> | Restriction site <sup>b</sup> |
|---------------|-------------------------------|-------------------------------|
| FWPpqsH       | CCGCTCGAGGGTCGTGCATGCTTGCCG   | XhoI                          |
| RVpqsH        | TAACTGCAGTTGCTCCTTAGCAGCGGC   | PstI                          |
| FWPpqsL       | TCCGCTCGAGGATCGTCACCGTCAACTG  | XhoI                          |
| RVpqsL        | TAACTGCAGCGTCATGGATGAGTCTCCG  | PstI                          |
| FWPpqsR       | TATAAGCTTAGGCCCTTGGTATTAACG   | HindIII                       |
| RVpqsR        | TATGAATTCCCCTTATTCCTTTTATTG   | EcoRI                         |
| FWPpchR       | TATCTCGAGCGATCTCCGTGGATGCG    | XhoI                          |
| RVPpchR       | TATAAGCTTGGTCATCAGTTTTTCCTGTA | HindIII                       |
| FWPphzA1      | GGCGGCAAGCTTCTCGTCGCTGTTCGAT  | HindIII                       |
| RVpphzA1      | TTTCCC GGATCCGCTGACCGTTCATGC  | BamHI                         |
| FWPphzA2      | AGCGCAGAATTCCCACCGGCAGCGTTT   | EcoRI                         |
| RVpphzA2      | ACGCAACTGCAGGTGTTCGGTAAACCC   | PstI                          |
| FWpqsLUP      | CCGCTCGAGACCGTGGTCGATGGCGT    | XhoI                          |
| RVpqsLUP      | CCGGAATTCCTCATGGATGAGTCTCC    | EcoRI                         |
| FWpqsLDOWN    | CCGGAATTCCTCGGCTGAACCCGCC     | EcoRI                         |
| RVpqsLDOWN    | TGCTCTAGACCTGTTCAATTACCCGAGCC | XbaI                          |
| FWpqsB        | CCGCTCGAGCGACCAGGGCTATCGCA    | XhoI                          |
| FWpqsE        | TATGAATTCATGTTGAGGCTTTCGGCTCC | EcoRI                         |
| RVpqsE        | TATGAGCTCTCAGTCCAGAGGCAGCGC   | SacI                          |
| FWpqsEΔ1-6    | TATGAATTCAGGCTTTCGGCTCC       | EcoRI                         |
| RVpqsEΔ1-6    | TATGAGCTCTGTCCCGTCTCAGTCCAG   | SacI                          |
| FWpqsENoFrame | TATGAATTCATGGTTGAGGCTTTCGGCTC | EcoRI                         |
| RVpqsB        | CCGGAATTCCTTATGCATGAGCTTCTCC  | EcoRI                         |
| FW16SRT       | AGTACGGCCGCAAGGTTAAA          | -                             |
| RV16SRT       | CCCAACATCTCACGACACGA          | -                             |
| FWpchRRT      | CTCAGCGCACAGTTCCTTTC          | -                             |
| RVpchRRT      | CGAACACCTTGCGAAAGCC           | -                             |
| FWpvdSRT      | GGAACAACCTGTCTACCCGCA         | -                             |
| RVpvdSRT      | GTAGCTGAGCTGTGCCTTGA          | -                             |
| FWlecART      | CAGGGCAGGTAACGTCGATT          | -                             |
| RVlecART      | CAACCCGGTATTGACCGGAA          | -                             |
| FWrhlART      | CATCTGCTCAACGACGACCGT         | -                             |
| RVrhlART      | TGCCGTTGATGAAATGCACG          | -                             |
| FWmexGRT      | CTGGCGAAGCTGTTTCGACTA         | -                             |
| RVmexGRT      | TTGCTCCAGAAGGTGTGGAC          | -                             |
| FWnosRRT      | AGCTATCGGTGGTCAACGTG          | -                             |
| RVnosRRT      | GCGAGTTCGTTGAGCAGTTC          | -                             |

| <b>Name</b>        | <b>Sequence (5'-3')<sup>a</sup></b> | <b>Restriction site<sup>b</sup></b> |
|--------------------|-------------------------------------|-------------------------------------|
| <i>FWhcpCRT</i>    | TATCAGGAAGGCCACGAGGA                | -                                   |
| <i>RVhcpCRT</i>    | CCACTGGATCTCGACCTTG                 | -                                   |
| <i>FWaprXRT</i>    | CTGCCGATCAACGTCTCCTT                | -                                   |
| <i>RVaprXRT</i>    | TACCGTAGAACTTGGCGCTG                | -                                   |
| <i>FWsodART</i>    | GCTGACCATGGAGATCCACC                | -                                   |
| <i>RVsodART</i>    | CGACATCACGGTCCAGAACA                | -                                   |
| <i>FWpqsERT</i>    | CGGTGTTCCCTGCTGCGTC                 | -                                   |
| <i>RVpqsERT</i>    | GACGCCAGGACCTGTACG                  | -                                   |
| <i>FWphnART</i>    | GCGACATGCTCAAGGTCGAT                | -                                   |
| <i>RVphnART</i>    | CTGCCGCGATAGCCATCTT                 | -                                   |
| <i>FWpqsE-phnA</i> | GTGGGCAGAGCGTCGACT                  | -                                   |
| <i>RVpqsE-phnA</i> | GTGCGGTACTCCAGACTTTC                | -                                   |

<sup>a</sup> Engineered restriction sites are underlined.

<sup>b</sup> -, no restriction site introduced.
