# Supplementary material for: Unravelling the Genome-Wide Contributions of Specific 2-Alkyl-4-Quinolones and PqsE to Quorum Sensing in Pseudomonas aeruginosa
Source: PubMed Central journal article supplement (PMC5112799; doi:10.1371/journal.ppat.1006029), 2016-11-16
Supplement: ppat.1006029.s005.pdf [file ppat.1006029.s005.pdf]

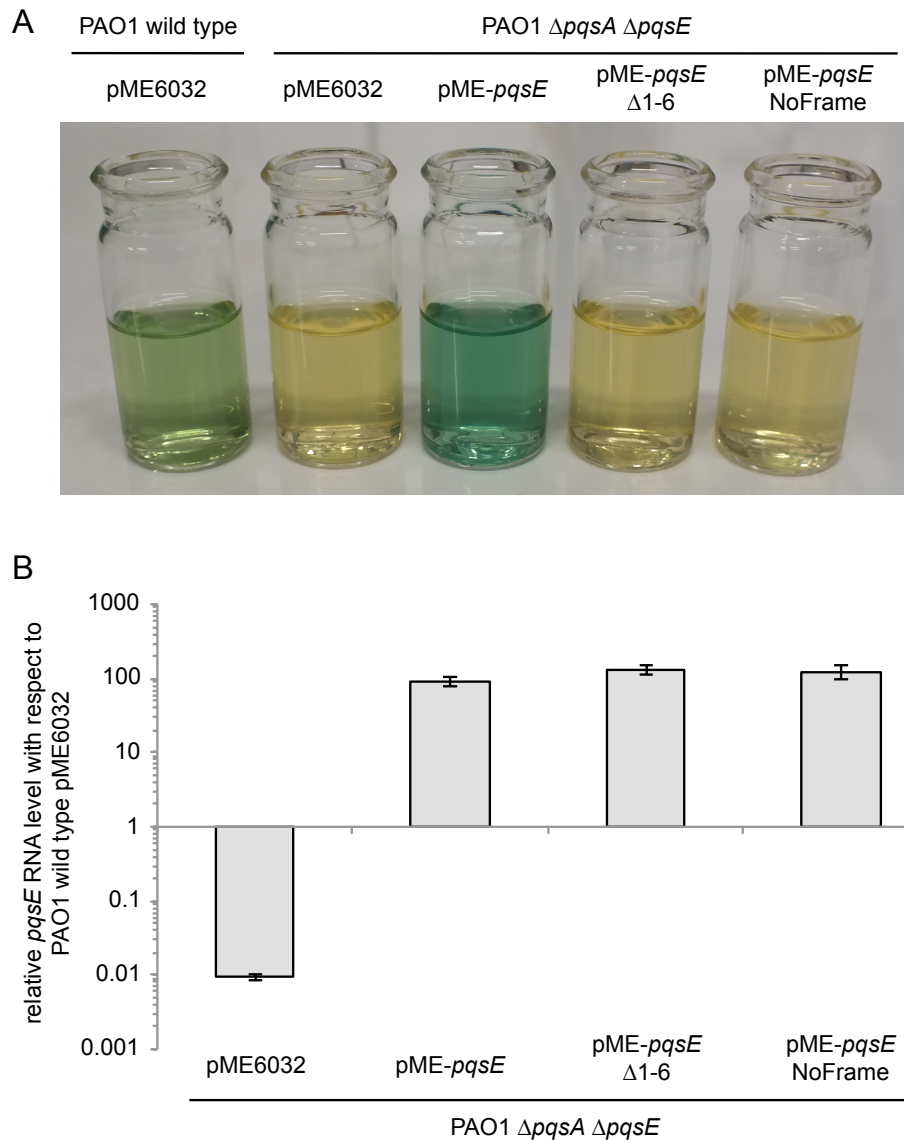

**Fig S2. The *pqsE* RNA transcript does not promote pyocyanin production**

Pyocyanin production (A) and *pqsE* RNA levels measured by Real Time PCR (B) in *P. aeruginosa*  $\Delta pqsA \Delta pqsE$  double mutant strains carrying the pME6032 empty vector or pME6032-derivative plasmids for IPTG-inducible expression of wild type *pqsE* (pME-*pqsE*), or *pqsE* mutated variants lacking the first two codons (pME-*pqsE* $\Delta 1-6$ ) or with a nucleotide insertion after the ATG to alter the protein frame (pME-*pqsE*NoFrame). Culture supernatants and total RNAs are from the indicated strains grown to an OD<sub>600</sub> of 1.5 in LB supplemented with 1 mM IPTG. For the Real time PCR analysis, data are normalized to the *pqsE* RNA level measured in parallel in the *P. aeruginosa* PAO1 wild type.
