# Supplementary material for: Unravelling the Genome-Wide Contributions of Specific 2-Alkyl-4-Quinolones and PqsE to Quorum Sensing in Pseudomonas aeruginosa
Source: PubMed Central journal article supplement (PMC5112799; doi:10.1371/journal.ppat.1006029), 2016-11-16
Supplement: ppat.1006029.s008.pdf [file ppat.1006029.s008.pdf]

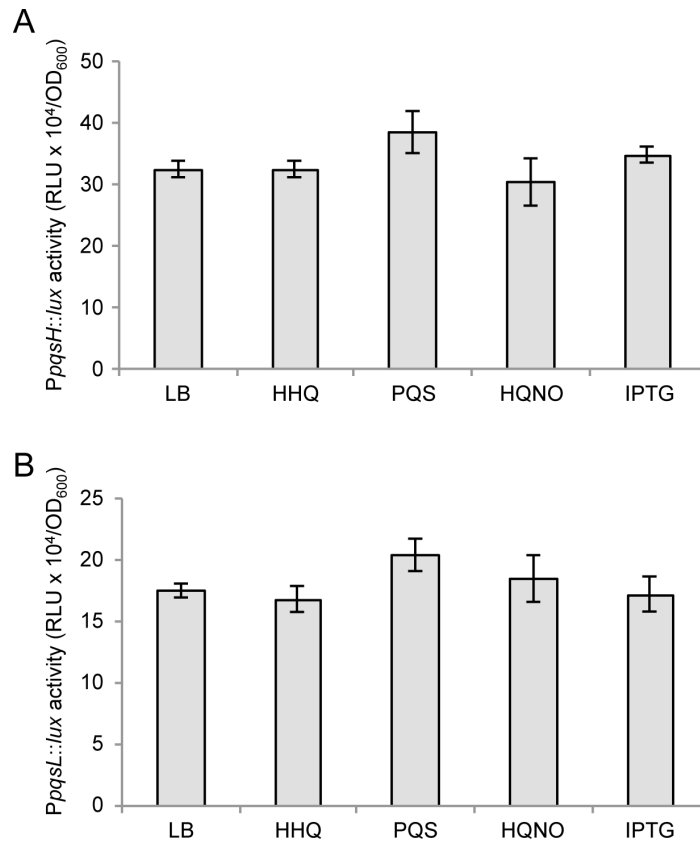

**Fig S5. AQs and PqsE do not affect *PpqSH* and *PpqSL* activity**

Maximal promoter activity measured in *P. aeruginosa*  $\Delta$ 4AQ strains carrying the transcriptional fusions (A) *PpqSH::lux* or (B) *PpqSL::lux*. Strains were grown in LB or in LB supplemented with 40  $\mu$ M AQs or 1 mM IPTG, as indicated below the graphs. Promoter activity is reported as Relative Light Units (RLU)/OD<sub>600</sub>.
