# Supplementary material for: Unravelling the Genome-Wide Contributions of Specific 2-Alkyl-4-Quinolones and PqsE to Quorum Sensing in Pseudomonas aeruginosa
Source: PubMed Central journal article supplement (PMC5112799; doi:10.1371/journal.ppat.1006029), 2016-11-16
Supplement: ppat.1006029.s009.pdf [file ppat.1006029.s009.pdf]

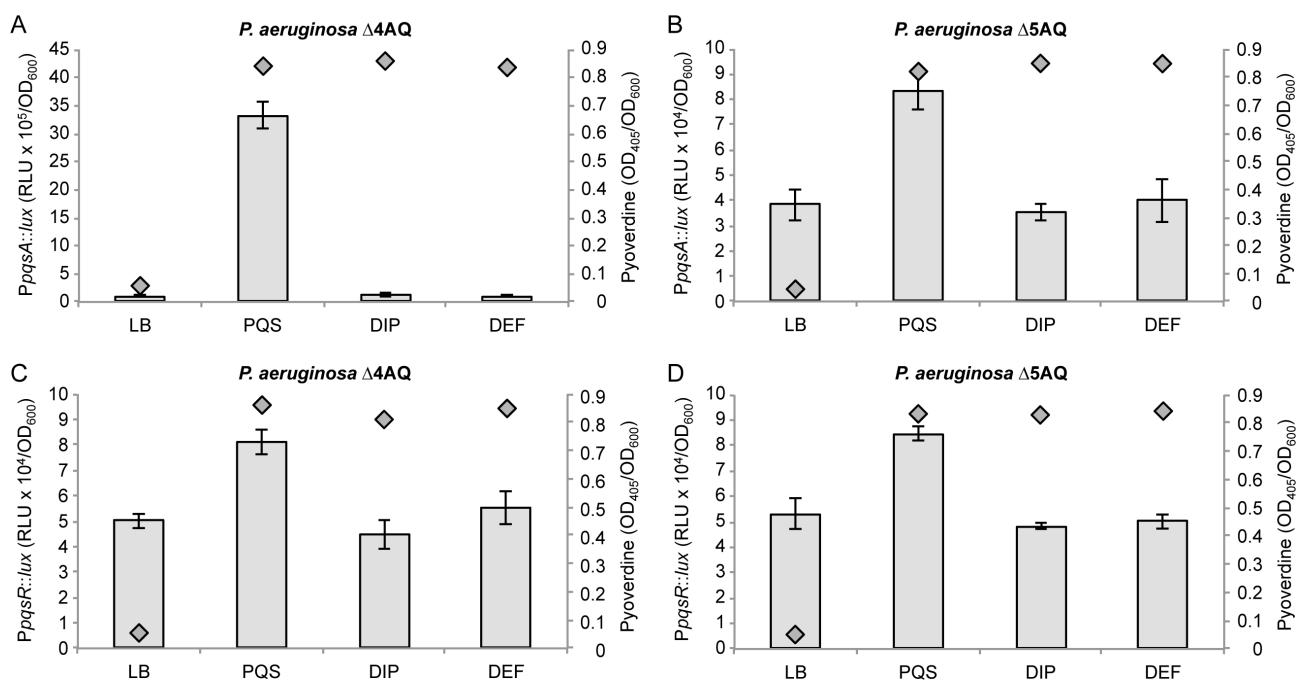

**Fig S6. The iron-chelators 2,2'-dipyridyl and deferiprone do not increase *PpqsA* activity**

Maximal promoter activity in strains carrying the transcriptional fusions *PpqsA::lux* (A and B) or *PpqsR::lux* (C and D). Strains were grown in LB or in LB supplemented with 40  $\mu$ M PQS, 500  $\mu$ M 2,2'-dipyridyl (DIP), or 160  $\mu$ M deferiprone (DEF), as indicated. Diamonds indicate the pyoverdine levels measured in parallel in culture supernatants. Promoter activity is reported as Relative Light Units (RLU)/ $OD_{600}$ ; pyoverdine levels are reported as  $OD_{405}$  normalized to cell density ( $OD_{600}$ ).
